# Supplementary material for: VOx Phase Mixture of Reduced Single Crystalline V2O5: VO2 Resistive Switching
Source: MDPI journal article supplement (doi:10.3390/ma15217652), 2022-10-31
Supplement: s1 [file s1]

# $\text{VO}_x$ phase mixture of reduced single crystalline $\text{V}_2\text{O}_5$ : $\text{VO}_2$ resistive switching

B. Walls, O. Murtagh, S. I. Bozhko, A. Ionov, A. A. Mazilkin, D. Mullarkey, A. Zhussupbekova, D. Shulyatev, K. Zhussupbekov, N. Andreev, N. Tabachkova, I. V. Shvets

## Supplemental Information

### 1 Reduction of $\text{V}_2\text{O}_5(010)$

Figure S1 depicts the full range  $\theta$ - $2\theta$  scan of the annealed crystal discussed in length in the manuscript.

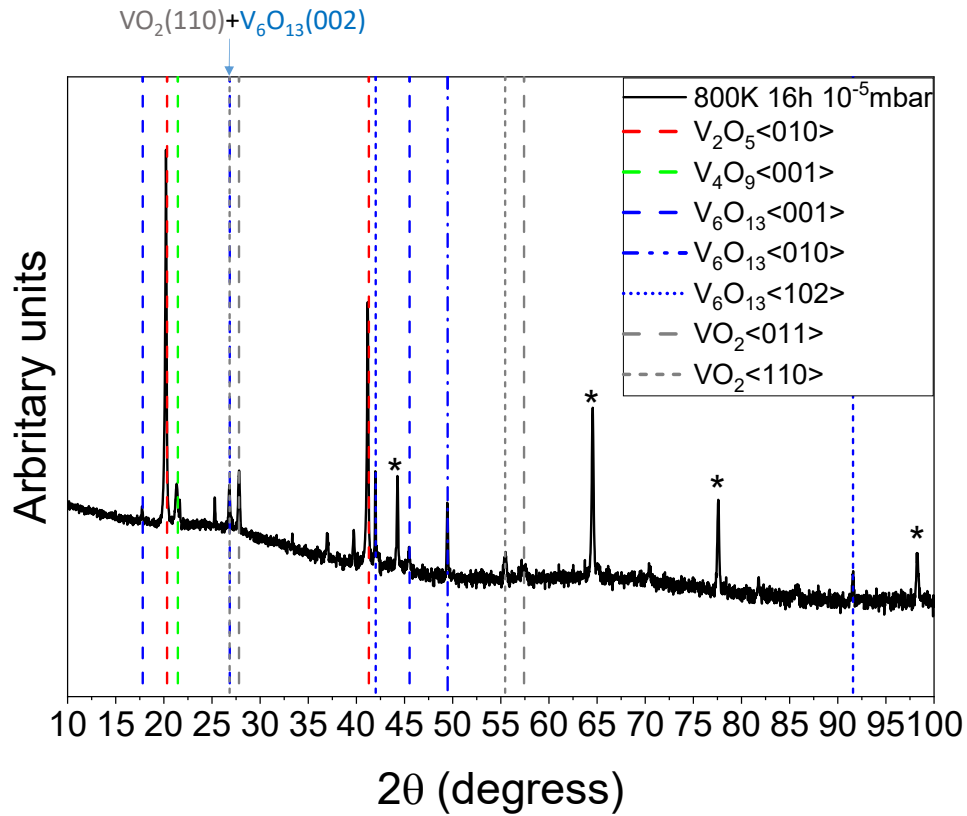

**Figure S1:** Full XRD scan of the annealed crystal discussed in the main text. The crystal has been annealed at 800 K for 16 h in a pressure of  $10^{-5}$  mbar. Asterisks represent peaks corresponding to the sample stage. Note that at  $27^\circ$  a  $\text{V}_6\text{O}_{13}(001)$  and  $\text{VO}_2(110)$  peak are overlapping.  $\text{V}_2\text{O}_5$  [24],  $\text{V}_4\text{O}_9$  [25],  $\text{V}_6\text{O}_{13}$  [35] and  $\text{VO}_2$  [34]

The reduction process has been examined as a function of vacuum anneal temperature. This informed the annealing conditions of the crystal examined in detail in the main text. Resistance measurements of crystals vacuum annealed at 600, 700, 800 and 900 K are depicted in Figure S2. In Figure S3 the XRD  $\theta$ -2 $\theta$  scans of the crystals are depicted.

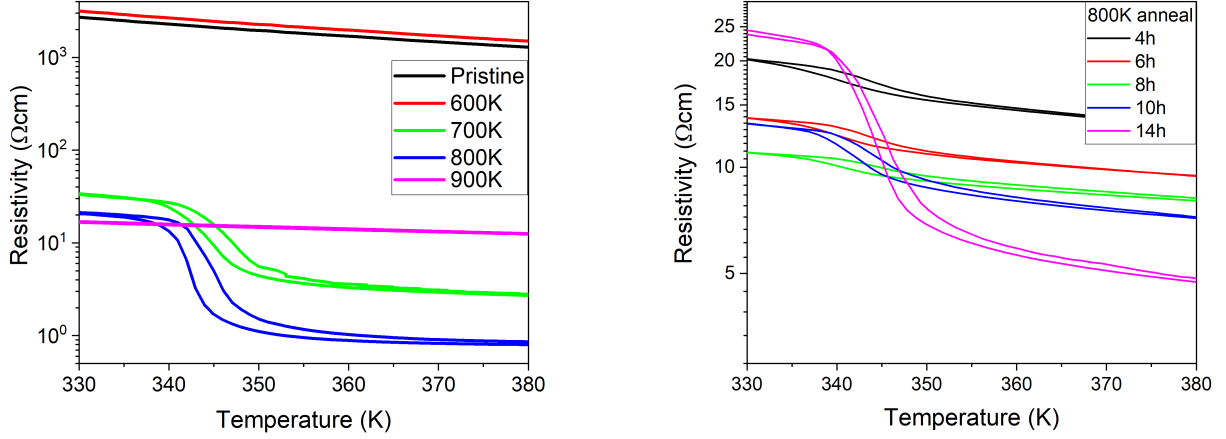

**Figure S2:** Left: resistance measurements of the crystals annealed at different temperatures. In each case further annealing only induces minor changes in the resistance profile. Right: resistance measurements of a crystal annealed at 800K for different durations.

The large resistance of 600 K annealed crystal suggests  $V_4O_9$  - the only additional phase introduced by the anneal - is of comparable resistance to  $V_2O_5$ . The lack of a  $VO_2$  resistance change in the 900K annealed crystal is suggested to be due to  $V_6O_{13}$  dominating the crystal, as evidenced by the XRD.

The evolution of the resistance of a crystal annealed at 800 K is depicted in Figure S2 right panel. After several hours of annealing a broad and small  $VO_2$  transition is apparent (—). With further annealing the resistance decreases over the entire temperature range, while the  $VO_2$  transition characteristics are largely unchanged (— and —). This is consistent with an increased content of metallic  $V_6O_{13}$ , which is the only metallic phase identified. Further annealing increases the resistance at low temperatures and decreases the resistance at higher temperature, and hence increases the magnitude of the  $VO_2$  resistive switch at around 345 K (— and —). This is consistent with an increased  $VO_2$  weight percent, which is higher (lower) resistance compared to  $V_6O_{13}$  at low (high) temperatures.

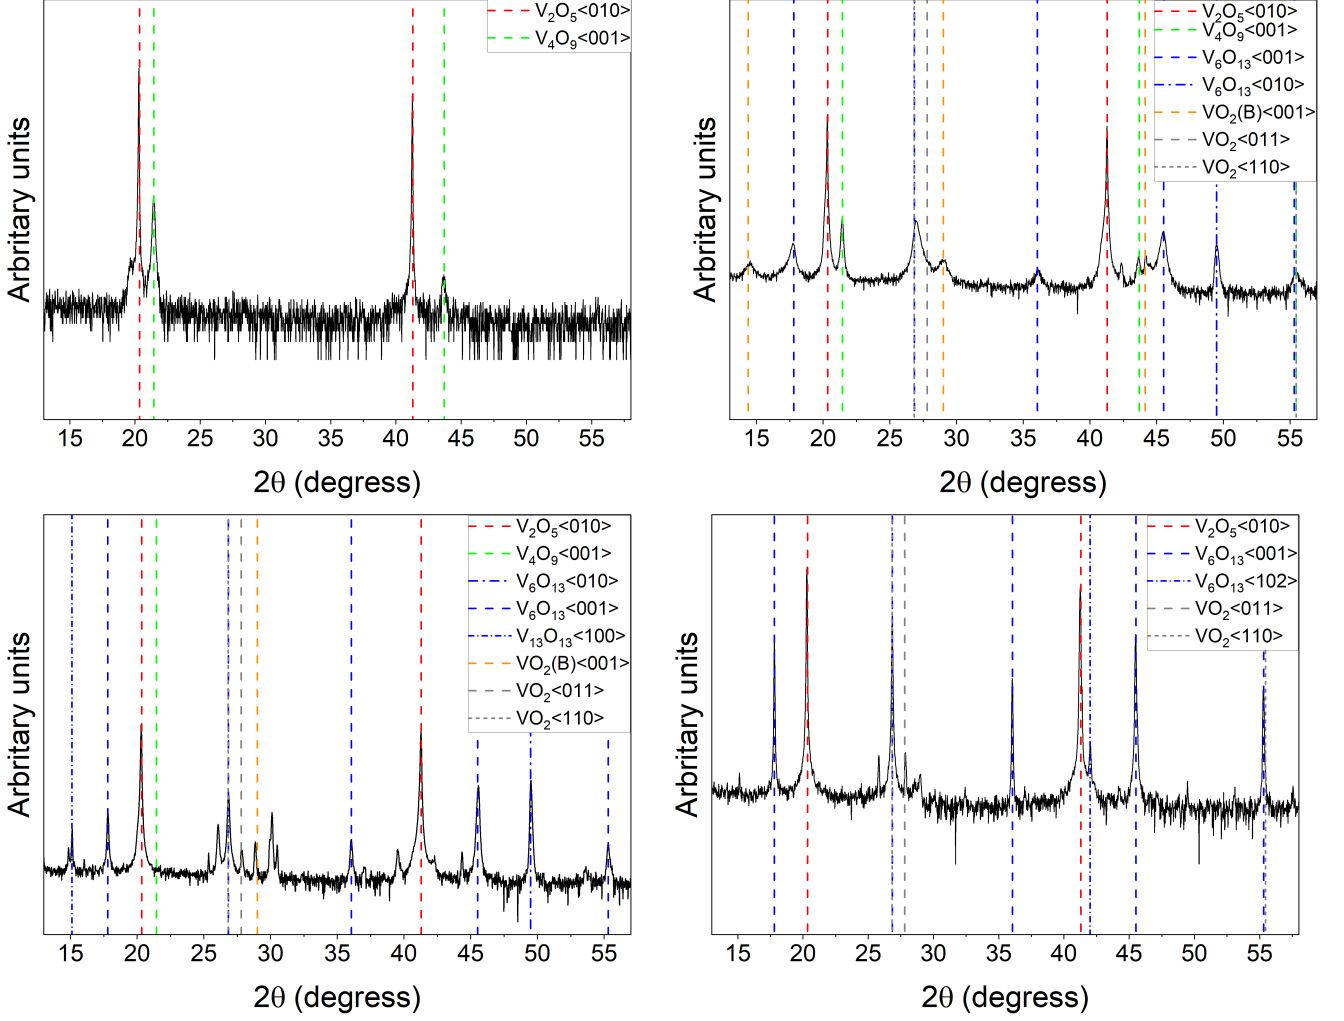

**Figure S3:**  $\text{V}_2\text{O}_5$  crystals have been annealed at different temperatures; 600 (top left), 700 (top right), 800 (bottom left) and 900 K (bottom right). The pressure was  $10^{-5}$  mbar in each case. Note that at  $27^\circ$  a  $\text{V}_6\text{O}_{13}(001)$  and  $\text{VO}_2(110)$  peak are overlapping.  $\text{V}_2\text{O}_5$  [24],  $\text{V}_4\text{O}_9$  [25],  $\text{V}_6\text{O}_{13}$  [35],  $\text{VO}_2(\text{B})$  [28] and  $\text{VO}_2$  [34]

## 2 Reproducibility of electrical measurements

For the voltage-current (VI) measurements discussed in the manuscript the VI was measured 6 times at each set temperature. The left top panel of Figure S4 depicts the 30 VI measurements, 6 at each set temperature. No appreciable degradation of the VI characteristics are observed. Inset depicts 20 consecutive VI measurements at 341 K. Again, no appreciable degradation of the VI characteristics are observed. Several weeks after these measurements the same crystal was remeasured; the IV characteristics at 340 K are shown in the top right panel of Figure S4. The low voltage resistive switching is observed. The VI was measured 6 times.

The bottom left panel depicts three different crystals annealed under the same conditions (800 K in a pressure of  $10^{-5}$  mbar) with the exception of duration. Crystal 1 (black) corresponds to a crystal annealed for 8 h (---) and

subsequently for another 8 h (—, 16 h total). Crystal 2 (red) corresponds to a crystal annealed for 26 h in 2 hour steps. Crystal 3 (green) corresponds to a crystal annealed for 16 h continuously (crystal examined in the paper). We consistently observe the  $\text{VO}_2$  transition and a low resistance at temperatures below the  $\text{VO}_2$  transition temperature. The differences are certainly related to the duration of the anneal and the correlated progression of the reduction. VI measurements on crystal 1 (---) in the bottom right panel again reveal low voltage resistive switching. The higher threshold and small resistance change - compared to the top left panel - are due to the larger resistance below the transition temperature and the small thermal resistance change, respectively.

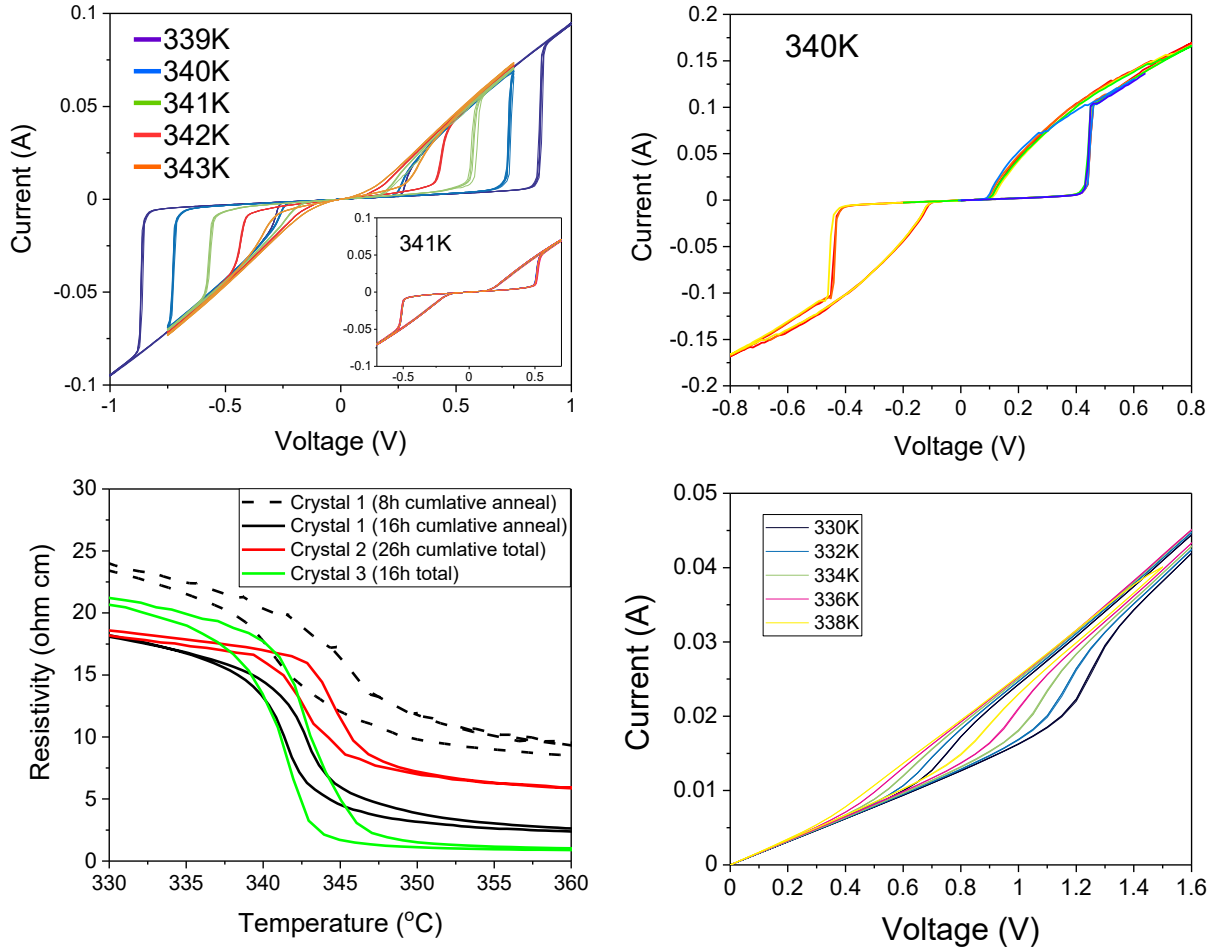

**Figure S4:** Cycling of the VI measurements. Left top panel; At each temperature the VI is measured 6 times. Inset are 20 measurements at 341 K. Right top panel; measurements were repeated several weeks later on a different part of the crystal. Bottom left panel; resistance of three different crystals. Right bottom panel; VI measurements of crystal 1 (--- in bottom left panel).

### 3 Scanning electron microscopy

Figure S5 demonstrates the scanning electron microscopy images of the samples before focused ion beam lamella preparation for transmission electron microscopy measurements. White dashed rectangles show the orientation of the lamellae to the main sample.

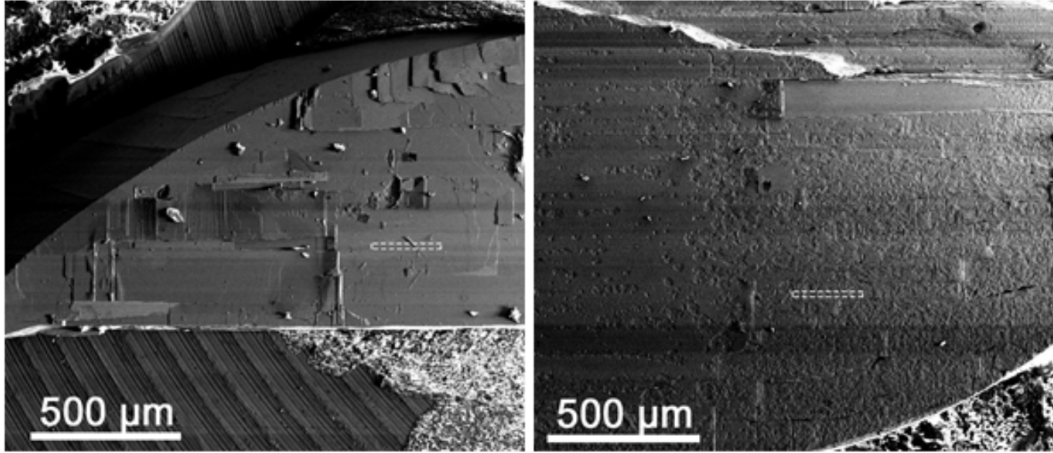

**Figure S5:** SEM images of the samples before TEM lamella FIB preparation. White dashed rectangles show the orientation of the lamellae to the main sample.
