# Supplementary figures and images for: VOx Phase Mixture of Reduced Single Crystalline V2O5: VO2 Resistive Switching
Source: MDPI journal article supplement (doi:10.3390/ma15217652), 2022-10-31

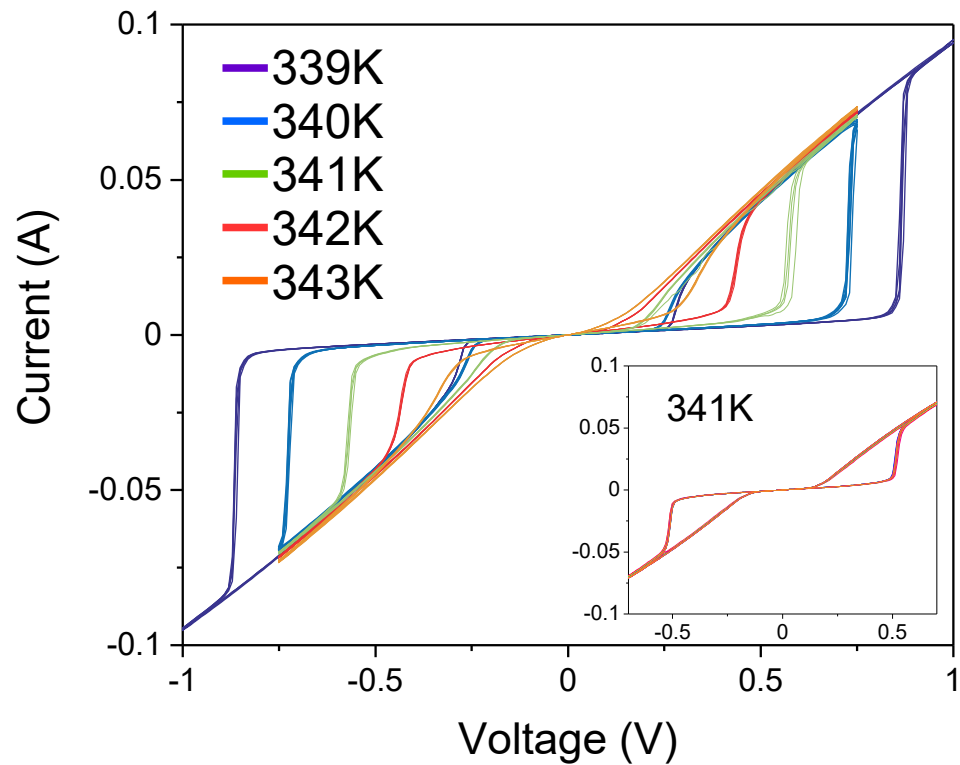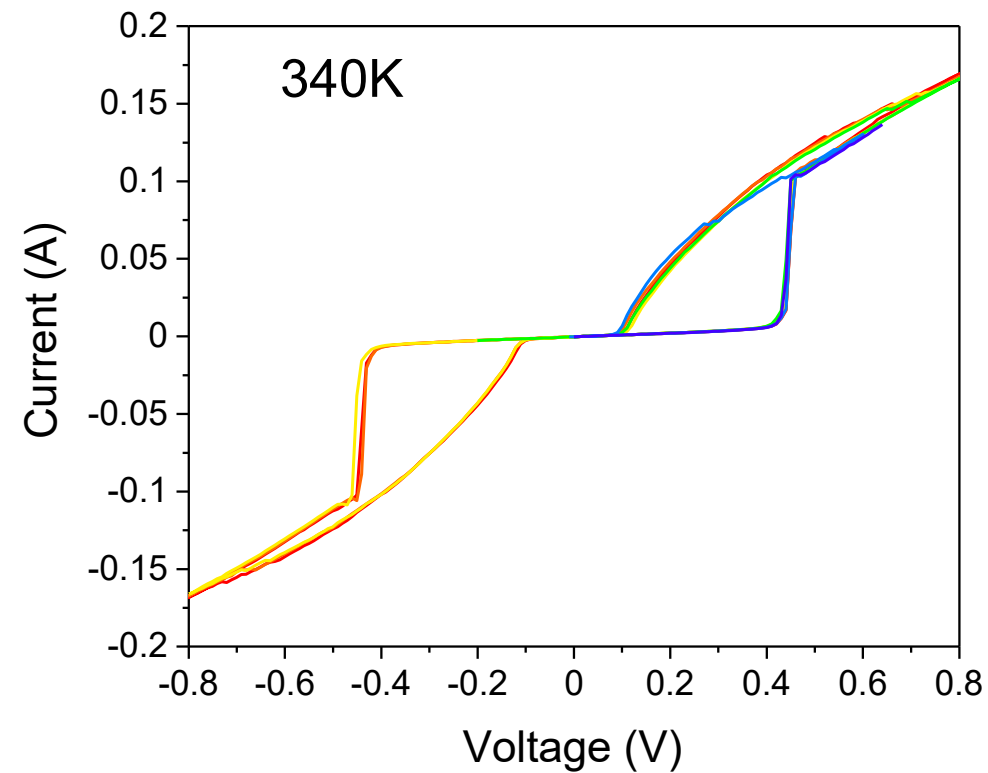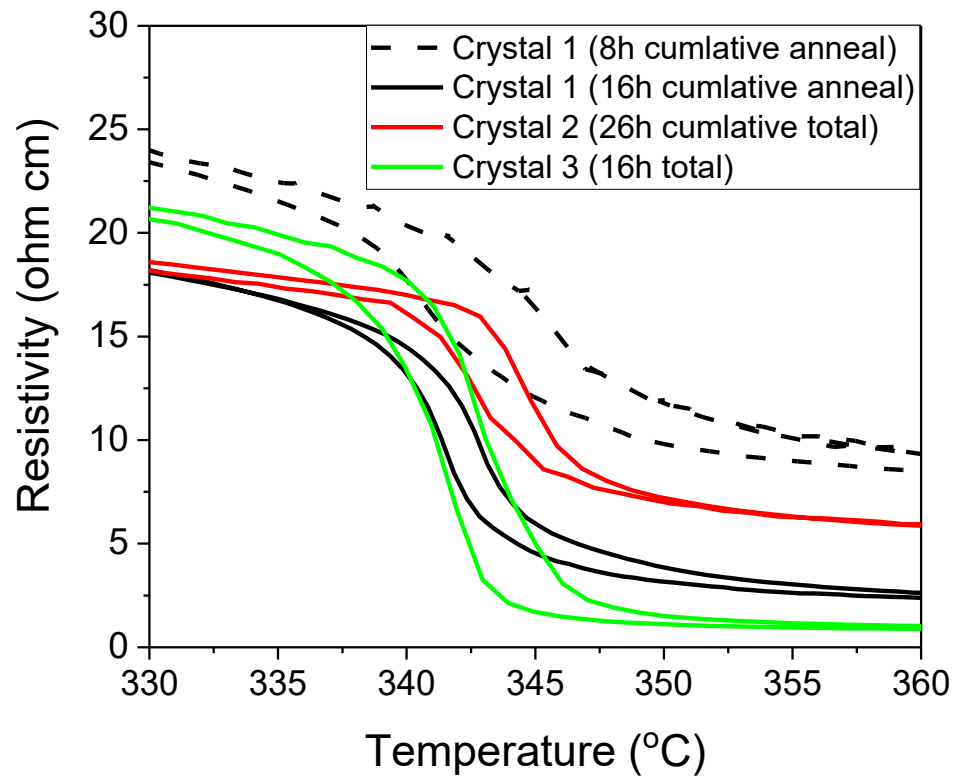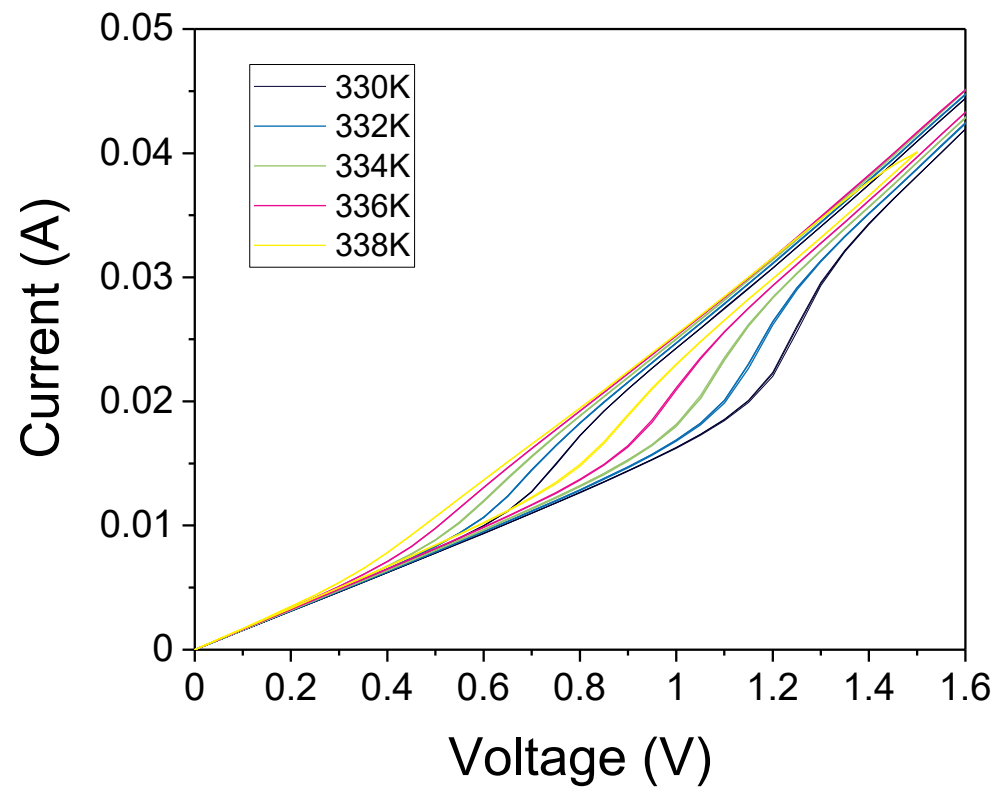

Supplement: s1 [file s1]

Arbitrary units

$\text{VO}_2(110) + \text{V}_6\text{O}_{13}(002)$

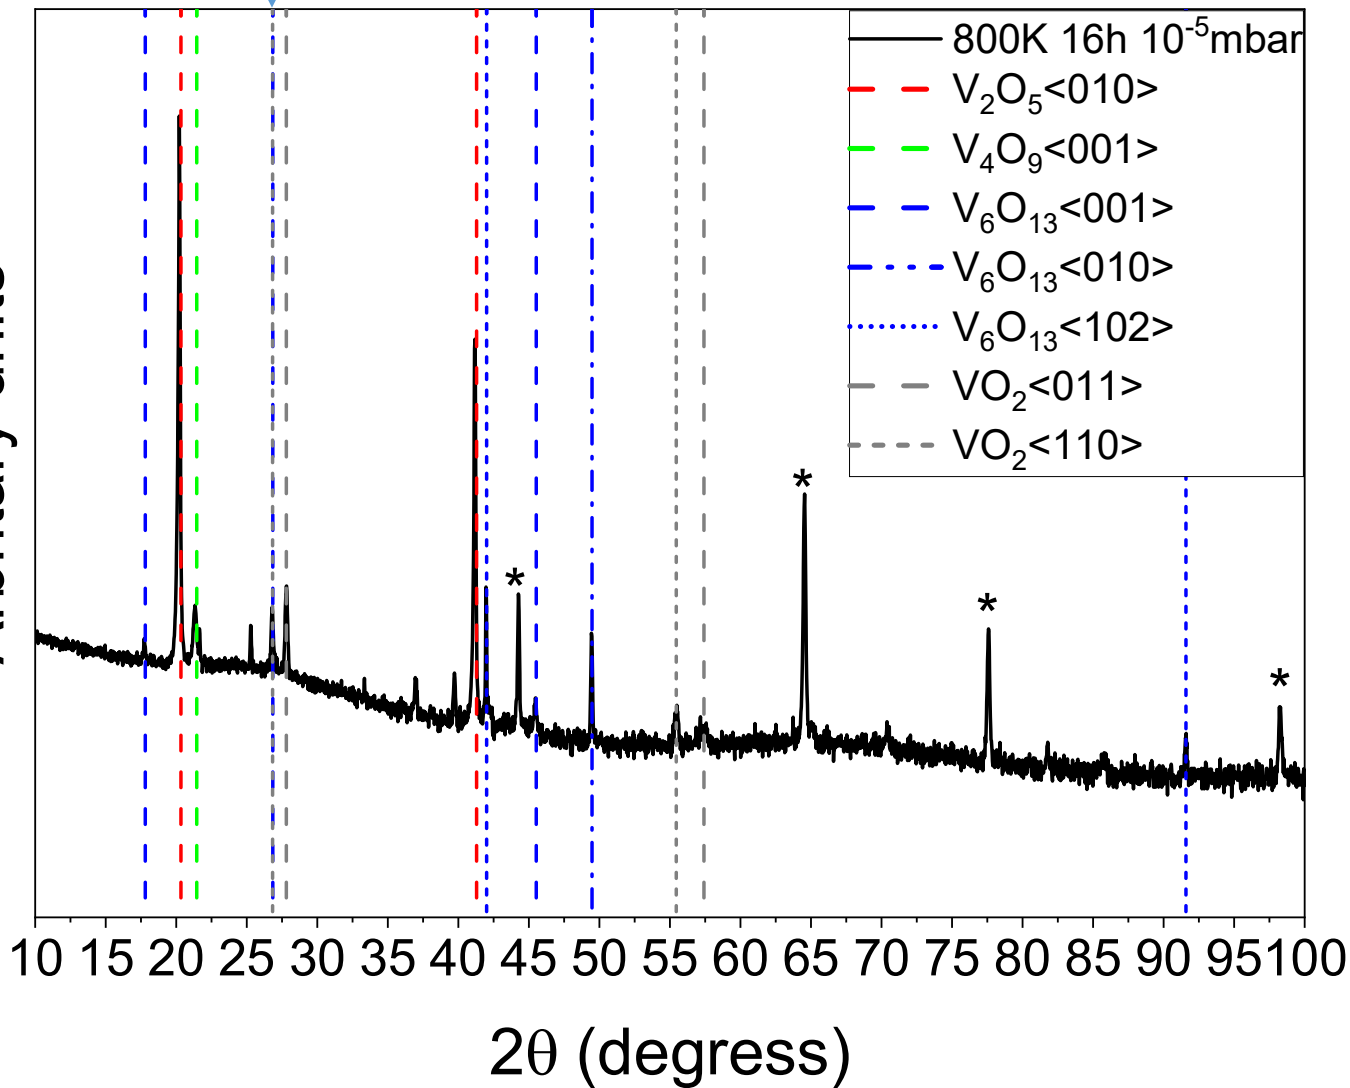

Supplement: s1 [file s1]
